# Supplementary material for: The importance of albumin infusion rate for plasma volume expansion following major abdominal surgery – AIR: study protocol for a randomised controlled trial
Source: PubMed Central journal article supplement (PMC5142270; doi:10.1186/s13063-016-1714-5), 2016-12-07
Supplement: 13063_2016_1714_MOESM3_ESM.pdf [file 13063_2016_1714_MOESM3_ESM.pdf]

**Appendix A. Definition of complications used as secondary outcomes.**

|                                                   |                                                                                                                                                                                                                                                                 |
|---------------------------------------------------|-----------------------------------------------------------------------------------------------------------------------------------------------------------------------------------------------------------------------------------------------------------------|
| <b>Infectious:</b>                                |                                                                                                                                                                                                                                                                 |
| Pneumonia                                         | X-ray signs + clinical signs or increase in CRP/temperature + treatment with antibiotics                                                                                                                                                                        |
| Abdominal infection                               | Clinical signs + increase in CRP/temperature (>38.5° C) + treatment with treatment with antibiotics                                                                                                                                                             |
| Wound infection                                   | Clinical signs (rubor, calor, dolor, functio laesa) + increase in CRP/temperature or positive culture + treatment with antibiotics                                                                                                                              |
| Urinary tract infection                           | Leucocytes + nitrate on urine sticks or positive culture + treatment with antibiotics                                                                                                                                                                           |
| Catheter infection                                | Local irritation + Clinical signs or positive culture + treatment with antibiotics                                                                                                                                                                              |
| Sepsis                                            | 2 out of 4 SIRS criteria + likely infection + treatment with antibiotics                                                                                                                                                                                        |
| Septic shock                                      | Sepsis necessitating inotropic support                                                                                                                                                                                                                          |
| Infection with unclear focus                      | CRP rise + fever + treatment with antibiotics                                                                                                                                                                                                                   |
| <b>Cardiovascular:</b>                            |                                                                                                                                                                                                                                                                 |
| Myocardial infarction                             | 1. Increase in Trop T + one of the following: typical symptoms for at least 15min or new infarction signs on ECG (Q-wave in at least 2 leads, new LBBB, new ST-T changes) or loss of viable myocardium as judged by new movement anomaly on cardiac ultrasound. |
| Postoperative hypotension                         | Mean arterial pressure <65 despite adequate volume transfusion, necessitating inotropic/vasopressor support                                                                                                                                                     |
| New arrhythmia                                    | New persistent arrhythmia on ECG necessitating treatment                                                                                                                                                                                                        |
| Pulmonary oedema                                  | Clinical signs + x-ray                                                                                                                                                                                                                                          |
| Stroke                                            | New neurological deficit and CT findings consistent with stroke                                                                                                                                                                                                 |
| Pulmonary embolism                                | CT or scintigram                                                                                                                                                                                                                                                |
| Deep vein thrombosis                              | Ultrasound or angiogram                                                                                                                                                                                                                                         |
| <b>Respiratory:</b>                               |                                                                                                                                                                                                                                                                 |
| Pleural effusion                                  | X-ray or ultrasound                                                                                                                                                                                                                                             |
| Pulmonary embolism                                | CT scan or lung scintigraphy                                                                                                                                                                                                                                    |
| Prolonged need for respiratory support            | Reintubation/NIV                                                                                                                                                                                                                                                |
| Secretions necessitating interventions            | Clinical signs + intervention (deep suctioning, extra physiotherapy, NIV, intubation)                                                                                                                                                                           |
| ALI/ARDS                                          | Sudden onset + bilateral infiltrates on x-ray (in absence of left heart failure) + PaO <sub>2</sub> /FiO <sub>2</sub> < 300/200                                                                                                                                 |
| <b>Abdominal:</b>                                 |                                                                                                                                                                                                                                                                 |
| Prolonged paralytic ileus                         | No bowel movement > 6 days postoperatively                                                                                                                                                                                                                      |
| Intraabdominal hypertension                       | >20 cmH <sub>2</sub> O surgical intervention necessary                                                                                                                                                                                                          |
| Abscess                                           | x-ray + clinical signs                                                                                                                                                                                                                                          |
| Intestinal ischemia                               | Visual diagnosis during reoperation                                                                                                                                                                                                                             |
| Anastomotic leakage                               | Visual diagnosis during reoperation                                                                                                                                                                                                                             |
| Wound dehiscence                                  | Surgical intervention necessary (in the ward or in theatre)                                                                                                                                                                                                     |
| <b>Renal:</b>                                     |                                                                                                                                                                                                                                                                 |
| Acute Kidney Injury                               | According to the KDIGO practice guideliner Kidney Inter. Suppl 2012                                                                                                                                                                                             |
| Need for dialysis                                 | Dialysis                                                                                                                                                                                                                                                        |
| <b>Bleeding disorders:</b>                        |                                                                                                                                                                                                                                                                 |
| Gastrointestinal bleeding                         | Clinical signs + pharmacologic or surgical intervention                                                                                                                                                                                                         |
| Coagulopathy                                      | PK>1.8 + APTT>60 sec or platelets count < 80.000/uL                                                                                                                                                                                                             |
| Unspecified bleeding                              | Transfusion of >1 unit of erythrocytes postoperatively                                                                                                                                                                                                          |
| <b>Prolonged stay in PACU or admission to ICU</b> | Still in PACU at 10.00 a.m. the first postoperative day due to need for prolonged observation                                                                                                                                                                   |
